# Supplementary material
Source: publisher site journal article supplement (https://www.spandidos-publications.com/151/downloadSupplementary)

Figure S1. mRNA and protein levels of TFEB were detected by RT-qPCR and western blot analysis following transfection with the pcDNA3.1 (+)-TFEB plasmid and the pcDNA3.1 (+)-vector. (A) mRNA expression of TFEB detected by RT-qPCR. (B) Protein expression of TFEB detected by western blotting. (C) Quantification of the western blot results. \*\* $P < 0.01$ , \*\*\* $P < 0.001$  vs. control vector. TFEB, transcription factor EB; NC, negative control; RT-qPCR, reverse transcription-quantitative polymerase chain reaction.

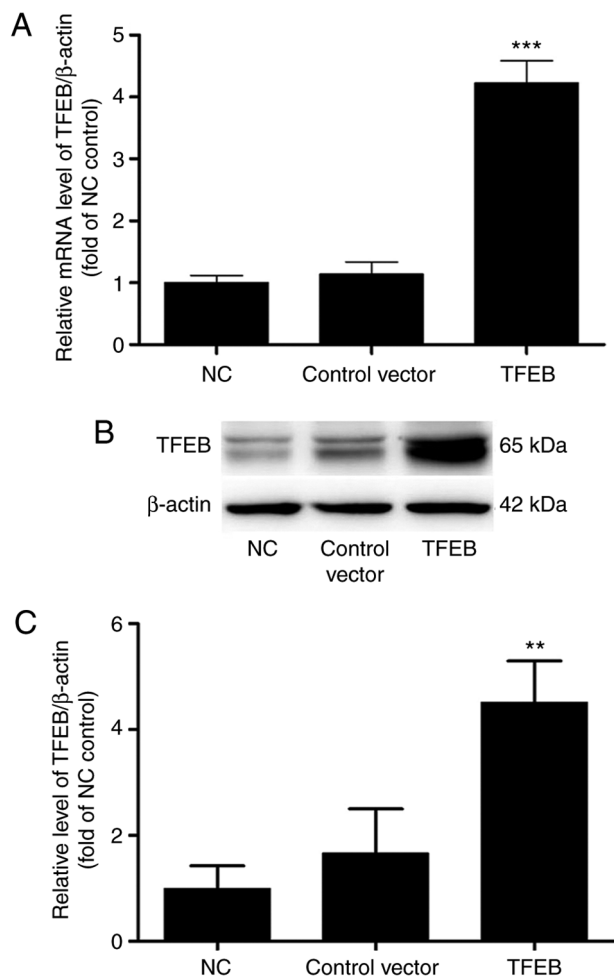

Figure S2. Podocytes were stimulated with HG for 48 h after overexpression of TFEB. Flow cytometry was used to detect the apoptosis rate of each group. Dot plots present the detection of 7-AAD (y-axis) and Annexin V-PE (x-axis). NG, normal glucose; HG, high glucose; TFEB, transcription factor EB; 7-AAD, 7-aminoactinomycin D; PE, phycoerythrin.

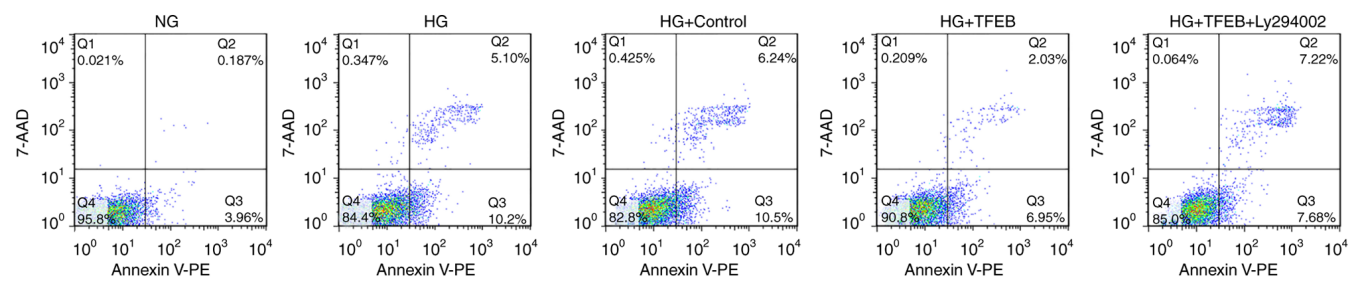

Supplement: Supplementary file 1 [file downloadSupplementary]
